# 1 Embedding community and public voices in co-created solutions to mitigate 2 antimicrobial resistance (AMR) in Thailand using the ‘Responsive Dialogues’ 3 public engagement framework 4

5 Tassawan Poomchaichote<sup>1</sup>, Niyada Kiatying-Angsulee<sup>2</sup>, Kanpong Boonthaworn<sup>1</sup>, Bhensri Naemiratch<sup>1</sup>,  
6 Supanat Ruangajorn<sup>1</sup>, Ravikanya Praparsavath<sup>1</sup>, Chaiwat Thirapantu<sup>3</sup>, Karnjariya Sukrung<sup>3</sup>, Direk  
7 Limmathurotsakul<sup>1,4,5</sup>, Anne Osterrieder\*<sup>1,4</sup>, Phaik Yeong Cheah<sup>1,4</sup>  
8

## 9 Affiliations

10 <sup>1</sup> Mahidol-Oxford Tropical Medicine Research Unit, Faculty of Tropical Medicine, Mahidol University,  
11 Bangkok, Thailand.

12 <sup>2</sup> Drug System Monitoring and Development Centre, Faculty of Pharmaceutical Sciences,  
13 Chulalongkorn University, Bangkok, Thailand.

14 <sup>3</sup> Civicnet Foundation, Bangkok, Thailand.

15 <sup>4</sup> Centre for Tropical Medicine & Global Health, Nuffield Department of Medicine, University of  
16 Oxford, Oxford, UK.

17 <sup>5</sup> Department of Tropical Hygiene, Faculty of Tropical Medicine, Mahidol University, Bangkok,  
18 Thailand.

19 \* Corresponding author: Anne Osterrieder ([anne.osterrieder@ndm.ox.ac.uk](mailto:anne.osterrieder@ndm.ox.ac.uk))  
20  
21

## 22 ABSTRACT

23  
24 The use of antimicrobials in Thailand has been reported as one of the highest in the world in human and  
25 animal sectors. Our engagement project aimed to improve our understanding of the issue of  
26 antimicrobial use and antimicrobial resistance (AMR) among adult Thai communities, and to co-create  
27 locally relevant solutions to AMR, especially those focusing on raising awareness to improve related  
28 policies in Thailand.  
29

30 We conducted a series of online and in-person ‘conversations’ according to Wellcome’s ‘Responsive  
31 Dialogues’ engagement approach, designed to bring together different voices to solve complex problems  
32 such as AMR. This approach enabled key AMR stakeholders and policy makers to hear directly from  
33 communities and members of the public, and vice versa. Conversations events took place between 25  
34 November 2020 and 8 July 2022, and we engaged 179 AMR key stakeholders and members of the public  
35 across Thailand.  
36

37 The issues we found were: there were quite a lot of misunderstandings around antimicrobials and AMR;  
38 participants felt that communications and engagement around antimicrobial resistance had limited reach  
39 and impact; asking for and taking antibiotics for self-limiting ailments is a social norm in Thailand; and  
40 there appeared to be a wide availability of cheap antimicrobials. To mitigate the spread of AMR,  
41 participants suggested that the messages around AMR should be tailored to the target audience, there  
42 should be more initiatives to increase general health literacy, there should be increased availability of  
43 AMR related information at the local level and there should be increased local leadership of AMR  
44 mitigation efforts.  
45

46 *250 words*  
47

48 **Thaicalinicaltrials.org registration:** TCTR20210528003 (28/05/2021)  
49

50 **Keywords:** antimicrobial resistance, AMR, Thailand, antibiotics, responsive dialogues, public  
51 engagement, co-creation, communication, solutions

NOTE: This preprint reports new research that has not been certified by peer review and should not be used to guide clinical practice.

## 52 KEY MESSAGES

53

### 54 What is already known on this topic

55 ⇒ Antimicrobial resistance (AMR) is a complex and systemic problem, which will require  
56 collaboration from many sectors. Any policies and interventions to address AMR need to be  
57 specific to the local context, ethical, and consider the affected communities.

58

### 59 What this study adds

60 ⇒ The regional spread and the depth of our community ‘conversations’ (e.g. 2.5-3 days for in-  
61 person ‘conversations’) enabled us to explore topics and important elements of solutions around  
62 AMR, summarise common themes, and compare views across different regions and communities  
63 in Thailand.

64

### 65 How this study might affect research, practice or policy

66 ⇒ Our project revealed some important ‘building blocks’ or elements for AMR-related policy, in  
67 particular relating to communications and engagement: messages around AMR should be  
68 tailored to the target audience, there should be more initiatives to increase general health  
69 literacy, there should be increased availability of AMR related information at the local level and  
70 there should be increased local leadership of AMR mitigation efforts.

71

72

## 73 INTRODUCTION

74

75 Antimicrobial resistance (AMR) is the ability of microorganisms to stop antimicrobial drugs from working  
76 effectively against them<sup>1-3</sup>. A recent study estimated that in 2019, 4.95 million deaths globally were  
77 associated with bacterial AMR, including 1.27 million deaths that were directly attributable to AMR<sup>4</sup>.  
78 AMR has been characterized as a ‘super-wicked’ problem that is systemic, multi-sectorial,  
79 multidisciplinary, borderless, global, and ethically challenging<sup>5-7</sup>. To maximise success, policies and  
80 interventions aiming to mitigate the problem of AMR need to be context-specific and locally driven.

81

82 Thailand is an upper-middle income country with a population of approximately 70.2 million people<sup>8,9</sup>. It  
83 has a high AMR burden<sup>10</sup> and high excess mortality due to hospital-acquired antimicrobial resistant  
84 infections<sup>11</sup>. It is estimated to have one of the highest antibiotics uses in both human and animal sectors  
85 among countries that have published official data on national antibiotic consumption<sup>12-14</sup>. In Thailand, by  
86 law, most oral antimicrobials, except tuberculosis drugs, can be dispensed by licensed pharmacists at  
87 pharmacies without a prescription from a qualified doctor<sup>15</sup>. The general public have a limited  
88 understanding of AMR, as surveys showed<sup>16,17</sup>. In some communities, antibiotics are perceived as a  
89 ‘quick fix’ for care, productivity, hygiene and social inequity<sup>18,19</sup>.

90

91 In this paper we report our findings from piloting a dialogue-based public engagement framework in  
92 Thailand. Developed by Wellcome, the “Responsive Dialogues on Drug Resistant Infections” framework  
93 was designed to bring together multiple stakeholders and communities across the ‘One Health’ spectrum  
94 to tackle complex problems such as AMR right in communities that are most affected<sup>20</sup>. The ‘responsive  
95 dialogue’ format enables AMR stakeholders and policy makers to hear directly from communities and  
96 members of the public and vice versa. The intended outcomes are to bridge the gap between policy and  
97 implementation, obtain a wide range of views, and facilitate sustained bi-directional interactions among  
98 stakeholders and people from various communities<sup>20</sup>. In 2019, Wellcome funded two pilots in Thailand  
99 and Malawi. This paper summarises the issues relevant to Thailand identified by our participants, and  
100 their co-created solutions.

101

102 The main objectives of our project were 1) to improve our understanding of the issue of antimicrobial  
103 use and AMR among adult Thai communities, and 2) to co-create locally relevant solutions to AMR,

104 thereby improving policies for reducing the burden of AMR in Thailand <sup>21</sup>. For practical reasons, we  
105 narrowed our scope to interventions and solutions that are actionable by those who participate in the  
106 project, in particular those related to engagement and awareness around AMR. This aligns with Strategy  
107 5 (public knowledge and awareness of appropriate use of antimicrobials) of the Thailand National  
108 Strategic Plan on Antimicrobial Resistance (NSP-AMR) <sup>22 23</sup>. Our project was intended to support the  
109 development of Strategy 5 of the new NSP-AMR 2023-2027.

110  
111

## 112 **“AMR Dialogues” in Thailand – a multi-phased approach combining in-person and online conversation** 113 **events**

114

115 Our “AMR Dialogues” project was conducted in three phases, following guidance of the Wellcome  
116 Responsive Dialogues toolkit <sup>20</sup>. These were: Phase I, ‘Groundwork’, which involved stakeholder mapping  
117 and ‘Planning Conversations’ with stakeholders, and inviting participants from communities; Phase II,  
118 ‘Community Conversations’, held in four regions of Thailand, as well as two virtual ‘National  
119 Conversations’; and Phase III, evaluation and feedback to stakeholders and participants (Table 1; Suppl.  
120 Table 2).

121

### 122 *Phase I: Groundwork*

123 This phase focused on understanding and mapping the ‘AMR ecosystem’ in Thailand. To produce a Thai  
124 AMR stakeholder map, we sought input from: AMR experts; existing literature <sup>20 24</sup>; stakeholders  
125 attending the ‘Planning Conversations’; and members of the ‘Bangkok Health Research and Ethics  
126 Interest Group’ (an established MORU public advisory group). We identified eight major stakeholder  
127 groups (Suppl. Table 1).

128

129 As part of Phase I, we conducted three “Planning Conversations” with key AMR stakeholders: two face-  
130 to-face meetings in Bangkok (Suppl. Table 1) and one virtual workshop due to COVID-19 restrictions.  
131 Stakeholders (defined as anyone with an interest in AMR) included government officers, researchers and  
132 experts, healthcare providers, science communication experts, and non-governmental organization  
133 representatives with an interest in AMR or related issues such as animal health and environmental issues  
134 (e.g., Greenpeace and World Animal Protection). These stakeholders were approached by personal  
135 contacts through existing networks of project team members (DL and NK), who were already involved in  
136 Thai AMR policy making and had worked in civil society for more than a decade. We specifically invited  
137 members of the Thai NSP-AMR subcommittee involved in writing the NSP-AMR 2023-2027 and previous  
138 versions to participate. The outcomes of the Planning Conversations were: to understand the AMR  
139 ecosystem in Thailand; align our project with the NSP-AMR; identify other stakeholders who should be  
140 involved; identify participants for the Community Conversations, provide input into the conversation  
141 event agenda, and map out current issues on AMR for discussion with participants. In our virtual  
142 workshop we discussed previous AMR engagement initiatives.

143

144 For public involvement, we piloted some of the activities and information materials used in Community  
145 Conversations with the Bangkok Health Research and Ethics Interest Group<sup>25</sup> and revised them based on  
146 their feedback.

147

### 148 *Evaluation*

149 The evaluation process was integrated into the project from its outset to have a continuous feedback  
150 loop<sup>21</sup>. Evaluation included feedback forms immediately after the Conversations and focus group  
151 discussions (FGDs) with selected participants. An estimated 80% of attendees participated in the  
152 evaluation. In total, we received 266 evaluation forms; 26 attendees participated in FGDs, and 16 in in-  
153 depth interviews (IDIs). The findings informed the subsequent conversations and ensured that the  
154 objectives of each phase of the project were achieved. The protocol, information sheet and consent form  
155 for the evaluation component of the project was approved by the ethics committee of the Thailand

156 Institute for the Development of Human Subject Protection (IHRP2021059) and the Oxford University  
157 Tropical Research Ethics Committee (OxTREC529-21).

158

159 *Phase II: Community Conversations*

160

161 We facilitated two types of Community Conversations: in-person regional conversations and online  
162 national conversations. By using this two-pronged approach, we hoped to be as inclusive as possible and  
163 maximise the chance of having a diverse audience, to obtain a wide range of perspectives and personal  
164 experiences. Each Community Conversation was guided by the following sequence as detailed in the  
165 'Responsive Dialogues' toolkit <sup>20</sup>: 1) introduce AMR and explore local issues related to AMR, 2) ideate and  
166 co-create local solutions and 3) choose promising/feasible solutions to take forward.

167

168 For our Community Conversations, we invited participants according to our selection criteria described  
169 previously.<sup>21</sup> Briefly, we aimed to include people from diverse backgrounds (age, gender, education  
170 levels, professions, socioeconomic backgrounds, disabilities), including those who might be affected by  
171 any changes in policy around antimicrobials, those who can influence change, and those who might be  
172 disproportionately affected by AMR and changes in related policies. We relied on our own networks,  
173 which were broad due to previous AMR work, and also approached local key informants and  
174 gatekeepers. Participants were invited by email or letter with all relevant details. All expenses incurred  
175 were paid by the project. Participants received compensation for their time to participate in the  
176 conversations: for regional conversations, we paid for accommodation, actual transportation costs,  
177 meals and a per diem of THB 400 per day. Participants in the online national conversations received THB  
178 1000 per session.

179

180 In total, our Conversation events had 248 participants (179 individual attendees, some of whom  
181 attended more than one conversation event; see Suppl. Table 2 for meeting details and participant  
182 backgrounds). The regional conversations focused on regional issues and were held in Chiangmai, Khon  
183 Kaen, Hat Yai and Bangkok for participants residing in the northern, north-eastern, southern and central  
184 regions of Thailand respectively. For these, we worked with Civinet Foundation, a community-based  
185 organisation with extensive experience in facilitating workshops in communities and inspiring change, to  
186 design and lead the activities. The first regional conversation ran over three full days (8 hours a day). In  
187 response to attendee feedback, the following three conversation events were shortened to 2.5 days. The  
188 national online conversations focused on national issues and were attended by people from all over the  
189 country. We conducted two sets of online conversations using Microsoft Teams: a 'National  
190 Conversation' and a Youth National Conversation'. Each online Conversation event included three 3-hour  
191 sessions with the same individuals (Suppl. Table 2). We invited 3-5 AMR stakeholders to join each  
192 community conversation, including key players in the NSP-AMR development, communication experts  
193 and AMR researchers. Agendas were modified to suit the context of each conversation event and  
194 informed by feedback from previous conversations; an example agenda is available online<sup>26</sup>.

195

196 In the conversations, we asked participants to generate as many ideas as possible, without going into too  
197 much detail about the practicalities of implementing these ideas. To narrow the scope, we focused on  
198 solutions aiming for more effective communication and engagement around AMR, and other tangible  
199 solutions actionable by participants themselves. In regional conversations, we asked participants to take  
200 into consideration their local health care system, and to create a concrete feasible one-year plan that  
201 they could implement in their communities. Suggestions that were not immediately actionable by  
202 participants, such as those around legislations or those to be actioned by other parties e.g. large  
203 pharmaceutical companies, World Health Organization (WHO), also emerged, but were not discussed in  
204 detail and are not reported here. After each conversation, the project team members reflected on the  
205 findings and summarized them. To produce the lists of key points, at the end of Phase II all findings and  
206 summary notes were analysed using an inductive approach of thematic analysis in interpreting the data  
207 into sub-themes, collapsed into bigger themes and linking into a core theme.

208 *Phase III: Feedback to Planning/Community Conversation participants and other stakeholders*

209

210 In this phase of the project, we presented findings from the Community Conversations to key AMR  
211 stakeholders through virtual and in-person meetings, conferences and reports (Table 1). We also invited  
212 relevant community leaders, change makers and ‘solution experts’ (e.g. communications experts) to  
213 some meetings. The findings and co-created solutions from this project were communicated to those  
214 involved in the writing of the NSP-AMR 2023-2027. Furthermore, we fed back our results to all  
215 participants using a printed booklet written in accessible language<sup>27</sup>. Also included in the booklet were a  
216 series of original graphics for use in communication materials. They portray informal antibiotic sales in  
217 Thailand (Fig. 1) and scenes from the conversation events (Suppl. Fig 1).

218

219

220 **Problems and drivers for AMR in Thailand**

221

222 Our project revealed four issues and drivers for AMR in Thailand.

223

224 1) *Misunderstandings around antimicrobials and AMR*

225 Participants mentioned that many people in Thailand refer to antibiotics (in Thai ยาปฏิชีวนะ *ya*  
226 *patichiwana*) as ‘anti-inflammatories’ (in Thai ยาแก้อักเสบ *ya kae ak-seb*). This often leads to a  
227 misunderstanding that antibiotics can treat muscle pain and inflammation and hence be used regularly  
228 for aches, pains and fevers. Participants also mentioned that the words ‘antimicrobials’ (in Thai ยาต้านจุลชีพ  
229 *ya tan jun la cheeb*) and ‘antibiotics’ in Thai are not easily understood, as they are formal words not used  
230 in everyday language. This is likely to be the reason why lay people and even healthcare professionals  
231 use other words (e.g. anti-inflammatories) to describe antibiotics and antimicrobials. Many participants  
232 did not know that antimicrobials also include antifungals, antiparasitics, and antivirals. This often leads to  
233 antibiotics being used for all types of illnesses, including common cold and COVID-19. Some people said  
234 that antibiotics are used often for prevention of illness or ‘just in case’.

235

236 2) *Limited reach and impact of communications and engagement around AMR*

237 Thailand has taken actions to address AMR, including production of videos and printed materials, and  
238 organising the annual Antimicrobial Awareness Day/Week, held since 2013<sup>28</sup>. The Thailand Ministry of  
239 Public Health also launched public campaigns to warn people about the dangers of ‘*yaa chud*’ poly-  
240 pharmacy packs that contain antibiotics. However, many of the participants in the Community  
241 Conversations said that they were not aware of the activities. For many, the Community Conversations  
242 were the first time they heard of AMR (Suppl. Fig 1). When participants discussed the impact and  
243 limitations of existing materials, they thought that some of them were not suitable for the target group,  
244 and digital engagement strategies were not able to reach those without internet access or smartphones  
245 or older people. In-person events were only held in big cities and did not reach those who live in smaller  
246 towns and villages. Participants also mentioned that there is a ‘lack of faces’ or emotions in Thai AMR  
247 messaging. Lastly, due to a lack of evaluation it is not known to what extent these communication or  
248 engagement efforts achieved their target objectives.

249

250 3) *Social norms around taking and requesting antibiotics*

251 All conversation events saw a lot of discussion around social norms. In Thailand, self-medication is  
252 practised broadly. When ill, many people buy medication at pharmacies or informal drug stores. Many  
253 people also mentioned that they themselves or someone they know share medications. Participants said  
254 many older people stop taking medications after their symptoms disappear, and often keep the  
255 unfinished medications for future use, either for themselves or for their families. Healthcare  
256 professionals mentioned that patients who see them in the clinic or hospital expect to be given some  
257 medication, even if the ailment is self-limiting. Doctors and pharmacists are also quick to prescribe  
258 antimicrobials for self-limiting ailments. Some participants referred to this an ‘addiction to antibiotics’.  
259 Others attributed it to lack of basic health literacy. Participants also mentioned that it is customary and

260 polite, and even caring to ask friends and family members if they have taken any medication when they  
261 feel unwell.

262

#### 263 4) *Availability of antimicrobials, limited monitoring and enforcement*

264 Participants confirmed that antimicrobials can be easily obtained from doctors and other healthcare  
265 workers in government hospitals and clinics. They said that most antimicrobials can be dispensed by  
266 licensed pharmacists at pharmacies without a prescription from a qualified doctor. They added that  
267 pharmacies are widely available and antibiotics are inexpensive. Participants mentioned that generally  
268 there is limited enforcement of the regulations. Antibiotics are also sold illegally at grocery stores, mobile  
269 grocers and informal drug stores. Participants confirmed that it was not difficult to buy '*yaa chud*', which  
270 usually contains an antibiotic, a steroid, and an antipyretic, e.g. paracetamol, packed together in small  
271 unlabelled plastic bags. They are cheap to buy and easily available in village stores, but their quality is not  
272 assured. Participants also mentioned that antibiotics are used widely in poultry, fish farms, veterinary  
273 sector and agriculture. In some cases, animal grade antibiotics are repackaged and sold for human  
274 consumption.

275

276

#### 277 **Co-created solutions: four locally actionable 'building blocks'**

278

279 In the course of the Conversation events, we collected many suggestions for potential solutions. Here we  
280 report only suggestions related to communications and engagement according to the scope of our  
281 project, which aimed to inform Strategy 5 (public knowledge and awareness of appropriate use of  
282 antimicrobials) of the NSP-AMR, and solutions actionable by the participants themselves. We outline  
283 four 'building blocks' of locally actionable solutions that participants suggested (detailed in Box 1):

284

- 285 • Messages around AMR should be clear and tailored to the target audience, and more frequent
- 286 • More initiatives to increase general health literacy
- 287 • Increased availability of AMR-related information at the local level
- 288 • Increased local leadership of AMR mitigation efforts

289

290

#### 291 **Discussion**

292 Thailand has made significant progress in improve its public health system,<sup>29</sup> including efforts to mitigate  
293 the problem of AMR, such as establishing the Thailand National Strategic Plan on Antimicrobial  
294 Resistance 2017-2022<sup>22 23</sup>. The Thai NSP-AMR has six strategies<sup>23</sup>. Our project aimed at informing  
295 Strategy 5, which at the time of the project focused on increasing public awareness of AMR; in the new  
296 NSP-AMR 2023-2027, Strategy 5 changed the focus to AMR literacy.

297 Our series of conversations confirmed some of the problem and drivers of AMR already known from  
298 other studies and the Thai national household surveys, for example that antimicrobials are still widely  
299 available including '*yaa chud*'<sup>15 30-32</sup>, and that there is still quite a lot of misunderstanding around  
300 antimicrobials<sup>16 17 23 31 32</sup>. Our findings, in line with other studies, demonstrate the importance of  
301 community involvement and co-production in developing and implementing strategies to tackle AMR at  
302 a local level and promote community ownership<sup>31 33</sup>.

303 In terms of solutions, participants suggested some changes to the current approaches to mitigate AMR.  
304 They recommended that communication messages regarding AMR should be concise, materials should  
305 be eye-catching and customized for the intended audience, there should be more programmes aimed at  
306 improving general health literacy, and local communities should have greater access to AMR-related  
307 information. This echoes what previously has been suggested by other studies: address the confusion  
308 between antibiotics and anti-inflammatories, explain the consequences of antibiotic overuse and misuse,

309 e.g. for viral infections, include the importance of sanitation and hygiene<sup>32 34-37</sup>, and tailor messages to  
310 the local context and specific misconceptions within a country<sup>38</sup>.

311 The most striking finding was that many thought that local leadership should play a more prominent role  
312 in efforts to mitigate AMR, and mitigation strategies should take into consideration local culture.  
313 Participants suggested that in some places, AMR awareness and related projects should be combined  
314 with entertainment, whereas in other places, where community networks are strong (e.g. southern  
315 Thailand), projects should be embedded within existing networks and the primary health system, to  
316 address implementation gaps of the strategy.

317 Our project had several strengths and limitations (Table 2). One of the most notable outcomes of the  
318 geographical approach was that in some of the regional conversations, participants suggested low-  
319 hanging and locally actionable suggestions that they can initiate in their communities. In fact, a few  
320 informal local groups formed to organise local events after the conversation events (Box 2).

321

## 322 **Conclusion**

323 The conversations using the 'Responsive Dialogues' approach unearthed many local issues and produced  
324 four 'building blocks' of locally actionable solutions. Our findings will be relevant to those who would like  
325 to involve communities and other stakeholders in their work, those who create tools or interventions for  
326 uptake by communities or local authorities, organisations who produce communication materials for  
327 increasing AMR or health literacy, and those looking for tangible policy solutions at a local level.

328

329 *2998 words*

330

331

## 332 **Abbreviations**

333

334 AMR Antimicrobial resistance

335 NSP-AMR Thailand National Strategic Plan on Antimicrobial Resistance

336

337

## 338 **Grant information**

339 This work was supported by the Wellcome Trust [221616]. The Mahidol-Oxford Tropical Medicine  
340 Research Unit is core funded by the Wellcome Trust [220221].

## 341 **Competing interests statement**

342 The authors declare no competing interest

## 343 **Data availability**

344 Data underlying the paper may be requested from the Mahidol-Oxford Tropical Medicine Data Access  
345 Committee. (email: [datasharing@tropmedres.ac](mailto:datasharing@tropmedres.ac))

346

## 347 **Author contributions**

348 PYC wrote the first draft of the paper and raised the funding. PYC, AO, DL, CT, NKA and TP designed the  
349 project. TP was the overall project manager. TP, RP, SK, CT, KS, NKA, RP and KB facilitated the  
350 conversation events. BN led the analysis of the findings and evaluation. NKA, DL, NS and SP provided  
351 input and guidance on the alignment of the project with the Thailand National Strategic Plan on

352 Antimicrobial Resistance. KB created the illustrations. All authors reviewed and approved the final  
353 version of the protocol. PYC is the principal investigator and the guarantor of the paper.

354

### 355 **Acknowledgements**

356 We would like to thank all of the participants in our conversation events for their insightful contributions,  
357 and for taking the time to attend our sessions. We thank members of the Bangkok Health Research  
358 Ethics Interest Group for their input in the development of the project. We also thank Lucy McDowell,  
359 Zaichen Mallace-Lu and Jo Zaremba for their support and intellectual input throughout the duration of  
360 the project.

361

362

### 363 **REFERENCES**

- 364 1 Prestinaci F, Pezzotti P, Pantosti A. Antimicrobial resistance: a global multifaceted phenomenon.  
365 *Pathog Glob Health* 2015;109(7):309-18. doi: 10.1179/2047773215y.0000000030 [published  
366 Online First: 20150907]
- 367 2 Reygaert WC. An overview of the antimicrobial resistance mechanisms of bacteria. *AIMS*  
368 *Microbiol* 2018;4(3):482-501. doi: 10.3934/microbiol.2018.3.482 [published Online First:  
369 20180626]
- 370 3 Pulingam T, Parumasivam T, Gazzali AM, et al. Antimicrobial resistance: Prevalence, economic  
371 burden, mechanisms of resistance and strategies to overcome. *Eur J Pharm Sci* 2022;170:106103.  
372 doi: <https://doi.org/10.1016/j.ejps.2021.106103>
- 373 4 Murray CJL, Ikuta KS, Sharara F, et al. Global burden of bacterial antimicrobial resistance in 2019:  
374 a systematic analysis. *The Lancet* 2022;399(10325):629-55. doi: 10.1016/S0140-6736(21)02724-0
- 375 5 Adebisi YA. Balancing the risks and benefits of antibiotic use in a globalized world: the ethics of  
376 antimicrobial resistance. *Globalization and Health* 2023;19(1):27. doi: 10.1186/s12992-023-  
377 00930-z
- 378 6 Littmann J, Viens AM, Silva DS. The super-wicked problem of antimicrobial resistance. In:  
379 Jamrozik E, Selgelid M, eds. *Ethics and Drug Resistance: Collective Responsibility for Global Public*  
380 *Health*. Cham: Springer International Publishing 2020:421-43. Available from:  
381 [https://doi.org/10.1007/978-3-030-27874-8\\_262020](https://doi.org/10.1007/978-3-030-27874-8_262020).
- 382 7 Varadan SR, Chandler CIR, Weed K, et al. A just transition for antimicrobial resistance: planning  
383 for an equitable and sustainable future with antimicrobial resistance. *The Lancet* doi:  
384 10.1016/S0140-6736(23)01687-2
- 385 8 The World Bank. The World Bank in Thailand 2023 [Available from:  
386 <https://www.worldbank.org/en/country/thailand> accessed 4th May 2023.
- 387 9 Worldometer. Thailand Population 2023 [Available from: [https://www.worldometers.info/world-  
388 population/thailand-population/](https://www.worldometers.info/world-population/thailand-population/) accessed 4th May 2023.
- 389 10 Lim C, Takahashi E, Hongsuwan M, et al. Epidemiology and burden of multidrug-resistant  
390 bacterial infection in a developing country. *Elife* 2016;5 doi: 10.7554/eLife.18082 [published  
391 Online First: 2016/09/07]
- 392 11 Lim C, Teparrukkul P, Nuntalohit S, et al. Excess mortality attributable to hospital-acquired  
393 antimicrobial-resistant infections: a 2-year prospective surveillance study in Northeast Thailand.  
394 *Open Forum Infect Dis* 2022;9(9):ofac305. doi: 10.1093/ofid/ofac305 [published Online First:  
395 20220620]
- 396 12 Limmathurotsakul D, Sandoe JAT, Barrett DC, et al. 'Antibiotic footprint' as a communication tool  
397 to aid reduction of antibiotic consumption. *J Antimicrob Chemother* 2019;74(8):2122-27. doi:  
398 10.1093/jac/dkz185 [published Online First: 2019/05/11]
- 399 13 Wongsuvan G, Wuthiekanun V, Hinjoy S, et al. Antibiotic use in poultry: a survey of eight farms in  
400 Thailand. *Bull World Health Organ* 2018;96(2):94-100. doi: 10.2471/BLT.17.195834 [published  
401 Online First: 2018/02/07]
- 402 14 World Health Organization (2018). WHO report on surveillance of antibiotic consumption: 2016-  
403 2018 early implementation. 2018.



- 404 15 Siltrakool B, Berrou I, Griffiths D, et al. Antibiotics' use in Thailand: community pharmacists'  
405 knowledge, attitudes and practices. *Antibiotics (Basel)* 2021;10(2) doi:  
406 10.3390/antibiotics10020137 [published Online First: 20210131]
- 407 16 Chanvatik S, Kosiyaporn H, Lekagul A, et al. Knowledge and use of antibiotics in Thailand: A 2017  
408 national household survey. *PLoS One* 2019;14(8):e0220990. doi: 10.1371/journal.pone.0220990  
409 [published Online First: 2019/08/10]
- 410 17 Tangcharoensathien V, Chanvatik S, Kosiyaporn H, et al. Population knowledge and awareness of  
411 antibiotic use and antimicrobial resistance: results from national household survey 2019 and  
412 changes from 2017. *BMC Public Health* 2021;21(1):2188. doi: 10.1186/s12889-021-12237-y
- 413 18 Denyer Willis L, Chandler C. Quick fix for care, productivity, hygiene and inequality: reframing the  
414 entrenched problem of antibiotic overuse. *BMJ Glob Health* 2019;4(4):e001590. doi:  
415 10.1136/bmjgh-2019-001590 [published Online First: 2019/09/10]
- 416 19 Lambraki IA, Chadag MV, Cousins M, et al. Factors impacting antimicrobial resistance in the  
417 South East Asian food system and potential places to intervene: A participatory, one health  
418 study. *Frontiers in Microbiology* 2023;13 doi: 10.3389/fmicb.2022.992507
- 419 20 Wellcome Trust 2021. Responsive Dialogues on drug resistant infections Version 2, 2021.  
420 Available from [https://cms.wellcome.org/sites/default/files/2021-02/responsive-dialogues-drug-](https://cms.wellcome.org/sites/default/files/2021-02/responsive-dialogues-drug-resistant-infections-tollkit.pdf)  
421 [resistant-infections-tollkit.pdf](https://cms.wellcome.org/sites/default/files/2021-02/responsive-dialogues-drug-resistant-infections-tollkit.pdf). Accessed 8 June 2021.
- 422 21 Poomchaichote T, Osterrieder A, Prapharsavat R, et al. "AMR Dialogues": a public engagement  
423 initiative to shape policies and solutions on antimicrobial resistance (AMR) in Thailand. *Wellcome*  
424 *Open Res* 2021;6:188. doi: 10.12688/wellcomeopenres.17066.2 [published Online First:  
425 20220407]
- 426 22 The Coordination and Integration Committee on Antimicrobial Resistance 2016 Thailand National  
427 Strategic Plan on Antimicrobial Resistance 2017-2021. Available from: [https://rr-](https://rr-asia.woah.org/wp-content/uploads/2020/03/thailand_thailands-national-strategic-plan-on-amr-2017-2021.pdf)  
428 [asia.woah.org/wp-content/uploads/2020/03/thailand\\_thailands-national-strategic-plan-on-amr-](https://rr-asia.woah.org/wp-content/uploads/2020/03/thailand_thailands-national-strategic-plan-on-amr-2017-2021.pdf)  
429 [2017-2021.pdf](https://rr-asia.woah.org/wp-content/uploads/2020/03/thailand_thailands-national-strategic-plan-on-amr-2017-2021.pdf) accessed 4 September 2023 Access.
- 430 23 Sumpradit N, Wongkongkathep S, Malathum K, et al. Thailand's national strategic plan on  
431 antimicrobial resistance: progress and challenges. *Bull World Health Organ* 2021;99(9):661-73.  
432 doi: 10.2471/blt.20.280644 [published Online First: 20210701]
- 433 24 Sumpradit N., Krobanan K., Youngkong S., et al. (2019). Mapping and prioritization of research on  
434 antimicrobial resistance in Thailand. Food and Drug Administration, Ministry of Public Health.  
435 2019.
- 436 25 Osterrieder A, Ruangkajorn S, Cheah PY. (2020) Terms of Reference for the Bangkok Health  
437 Research and Ethics Interest Group (HREIG). Zenodo. <http://doi.org/10.5281/zenodo.4312633>.
- 438 26 Thirapantu Chaiwat, Sukrung Karnjariya, Poomchaichote Tassawan, et al. Agenda of  
439 Antimicrobial Resistance (AMR) Dialogues in the North-eastern region of Thailand (1.0). 2023.  
440 doi: <https://doi.org/10.5281/zenodo.83147712023>.
- 441 27 Poomchaichote T, Boonthaworn K, Naemiratch B, et al. Summary of key findings of Antimicrobial  
442 Resistance Dialogues in Thailand (สรุปสาระสำคัญจากโครงการเสวนาเรื่องเชื้อดื้อยาในประเทศไทย) (1.0 date  
443 20230611). 2023. doi: <https://doi.org/10.5281/zenodo.80246562023>.
- 444 28 Sumpradit N, Wongkongkathep S, Poonpolsup S, et al. New chapter in tackling antimicrobial  
445 resistance in Thailand. *BMJ* 2017;358:j3415. doi: 10.1136/bmj.j2423 [published Online First:  
446 2017/09/07]
- 447 29 Wibulpolprasert S, Fleck F. Thailand's health ambitions pay off. *Bull World Health Organ*  
448 2014;92(7):472-3. doi: 10.2471/BLT.14.030714
- 449 30 Sunpuwan M, Punpuing S, Jaruruengpaisan W, et al. What is in the drug packet?: access and use  
450 of non-prescribed poly-pharmaceutical packs (Yaa Chud) in the community in Thailand. *BMC*  
451 *Public Health* 2019;19(1):971. doi: 10.1186/s12889-019-7300-5
- 452 31 Arparsrithongsagul S, Kulsomboon V, Zuckerman IH. Multidisciplinary perspective intervention  
453 with community involvement to decrease antibiotic sales in village groceries in Thailand. *Asia*  
454 *Pacific Journal of Public Health* 2015;27(2):NP2480-NP88. doi: 10.1177/1010539513479968

- 455 32 Khamsarn S, Nampoonsak Y, Busamaro S, et al. Epidemiology of antibiotic use and antimicrobial  
456 resistance in selected communities in Thailand. *J Med Assoc Thai* 2016;99(3):270-5.
- 457 33 Mitchell J, Cooke P, Ahorlu C, et al. Community engagement: The key to tackling antimicrobial  
458 resistance (AMR) across a One Health context? *Global Public Health* 2022;17(11):2647-64. doi:  
459 10.1080/17441692.2021.2003839
- 460 34 Chanvatik S, Donnua S, Lekagul A, et al. Antibiotic use in mandarin production (*Citrus reticulata*  
461 *Blanco*) in major mandarin-producing areas in Thailand: A survey assessment. *PLoS One*  
462 2019;14(11):e0225172. doi: 10.1371/journal.pone.0225172 [published Online First: 20191113]
- 463 35 Thamlikitkul V, Rattanaumpawan P, Boonyasiri A, et al. Operational actions of the Thailand  
464 antimicrobial resistance (AMR) containment and prevention program in response to the World  
465 Health Organization (WHO) Global Action Plan on AMR. *Journal of Health Systems Research*  
466 2018;11(4)
- 467 36 Haenssger MJ, Charoenboon N, Zanella G, et al. Antibiotic knowledge, attitudes and practices:  
468 new insights from cross-sectional rural health behaviour surveys in low-income and middle-  
469 income South-East Asia. *BMJ Open* 2019;9(8):e028224. doi: 10.1136/bmjopen-2018-028224  
470 [published Online First: 20190820]
- 471 37 Praphasavat R, Lim C, Sunthornsut P, et al. The utility of an AMR dictionary as an educational  
472 tool to improve public understanding of antimicrobial resistance [version 1; peer review: 1  
473 approved]. *Wellcome Open Research* 2021;6(113) doi: 10.12688/wellcomeopenres.16488.1
- 474 38 Huttner B, Saam M, Moja L, et al. How to improve antibiotic awareness campaigns: findings of a  
475 WHO global survey. *BMJ Global Health* 2019;4(3):e001239. doi: 10.1136/bmjgh-2018-001239
- 476 39 Poomchaichote T, Praphasavat R. Embedding public and community voices in shaping Thailand's  
477 National Strategic Plan on Antimicrobial Resistance. 2022. Available from:  
478 <https://youtu.be/DPc9oCqwJCo2022>.
- 479 40 Arnstein, S. (1969.) A ladder of citizen participation. *Journal of the American Planning*  
480 *Association*, 35(4), 216–224. doi: 10.5281/zenodo.8314771
- 481 41 Health Policy and Systems Research on Antimicrobial Resistance Network. Thailand's One Health  
482 Report on antimicrobial consumption and antimicrobial resistance in 2019. 2021
- 483 42 Tompson AC, Chandler CI (2021). Addressing antibiotic use: insights from social science around  
484 the world. Project report. London School of Hygiene & Tropical Medicine. 2021.
- 485 43 King R, Hicks J, Rassi C, et al. A process for developing a sustainable and scalable approach to  
486 community engagement: community dialogue approach for addressing the drivers of antibiotic  
487 resistance in Bangladesh. *BMC Public Health* 2020;20(1):950. doi: 10.1186/s12889-020-09033-5
- 488 44 Jeena Y, Jeena R. "Ba Worn Santisook Project" : A participatory model of Home, Temple, School  
489 for promote morality of 12 values , Chiang Mai. *Journal of MCU Peace Studies* 2018;6(sp1):47-60.
- 490 45 Phongrod Y, Limsiriwong S, Tana S, et al. Model development of participatory process in moving  
491 forward B.W.R. principle (Home, Temple, School) in order to build strong and sustainable  
492 communities: case Study of Ban Khlong Toei Community, Bueng Kok Sub-district, Bangrakam  
493 District, Phitsanulok Province. *Humanities and Social Sciences Journal of Pibulsongkram Rajabhat*  
494 *University* 2021;15(2):502-16. doi: 10.14456/psruhss.2021.38
- 495  
496

497 **Table 1:** Timeline of the ‘AMR Dialogues’ project, showing the three project phases, key activities  
498 undertaken in each phase, and locations.  
499

| Project phase                                                           | Activities                                                                                                                                                                                                                                                                                                                                                                                                             | Location                                                                                           |
|-------------------------------------------------------------------------|------------------------------------------------------------------------------------------------------------------------------------------------------------------------------------------------------------------------------------------------------------------------------------------------------------------------------------------------------------------------------------------------------------------------|----------------------------------------------------------------------------------------------------|
| <b>Phase I: Groundwork</b>                                              |                                                                                                                                                                                                                                                                                                                                                                                                                        |                                                                                                    |
| September 2020-May 2021                                                 | <ul style="list-style-type: none"> <li>○ AMR stakeholder mapping</li> <li>○ Meetings with extended project team</li> <li>○ Designing planning and community conversation events</li> <li>○ Establishing collaboration with external facilitators</li> <li>○ Participant selection and invitation</li> <li>○ Developing evaluation framework and protocol</li> <li>○ Ethics approval for evaluation protocol</li> </ul> |                                                                                                    |
| 25 <sup>th</sup> November 2020                                          | Planning Conversation 1 (key stakeholders, in-person)                                                                                                                                                                                                                                                                                                                                                                  | Bangkok                                                                                            |
| 7 <sup>th</sup> January 2021                                            | Virtual Planning Conversation 2 (key stakeholders, online during COVID-19 restrictions)                                                                                                                                                                                                                                                                                                                                | Online                                                                                             |
| 31 <sup>st</sup> March – 1 <sup>st</sup> April 2021                     | Planning Conversation 2 (key stakeholders, in-person)                                                                                                                                                                                                                                                                                                                                                                  | Bangkok                                                                                            |
| <b>Phase 2: Community Conversations</b>                                 |                                                                                                                                                                                                                                                                                                                                                                                                                        |                                                                                                    |
| 6 <sup>th</sup> May, 2 <sup>nd</sup> June and 1 <sup>st</sup> July 2021 | Adult National Conversation                                                                                                                                                                                                                                                                                                                                                                                            | Online                                                                                             |
| 3 <sup>rd</sup> , 10 <sup>th</sup> , and 17 <sup>th</sup> Nov 2021      | Youth National Conversation                                                                                                                                                                                                                                                                                                                                                                                            | Online                                                                                             |
| 14 <sup>th</sup> –16 <sup>th</sup> December 2021                        | North-eastern Conversation                                                                                                                                                                                                                                                                                                                                                                                             | Khon Kaen                                                                                          |
| 21 <sup>st</sup> –23 <sup>rd</sup> February 2022                        | Northern Conversation                                                                                                                                                                                                                                                                                                                                                                                                  | Chiangmai                                                                                          |
| 29 <sup>th</sup> – 31 <sup>st</sup> March 2022                          | Southern Conversation                                                                                                                                                                                                                                                                                                                                                                                                  | Hat Yai                                                                                            |
| 18 <sup>th</sup> –20 <sup>th</sup> May 2022                             | Central Conversation                                                                                                                                                                                                                                                                                                                                                                                                   | Bangkok                                                                                            |
| <b>Phase III: Feedback to participants</b>                              |                                                                                                                                                                                                                                                                                                                                                                                                                        |                                                                                                    |
| 19 <sup>th</sup> May 2022                                               | Webinar, The Global Health Network. <sup>39</sup>                                                                                                                                                                                                                                                                                                                                                                      | Online                                                                                             |
| 17 <sup>th</sup> June 2022                                              | Feedback Session 1 (key stakeholders)                                                                                                                                                                                                                                                                                                                                                                                  | Bangkok                                                                                            |
| 27 <sup>th</sup> - 28 <sup>th</sup> June 2022                           | Oral presentation at the Third National Forum on AMR, Thailand (key stakeholders)                                                                                                                                                                                                                                                                                                                                      | Bangkok                                                                                            |
| 8 <sup>th</sup> July 2022                                               | Feedback Session 2 (key AMR stakeholders)                                                                                                                                                                                                                                                                                                                                                                              | Bangkok                                                                                            |
| 12 <sup>th</sup> July 2022                                              | Attendance at meeting to contribute to the drafting of Strategy 5 for the National Strategic Plan on Antimicrobial Resistance (NSP-AMR) 2023-2027                                                                                                                                                                                                                                                                      | Bangkok                                                                                            |
| 20 <sup>th</sup> -22 <sup>nd</sup> September 2022                       | Learning Event, Wellcome (Malawi and Thailand teams, funders and Wellcome stakeholders)                                                                                                                                                                                                                                                                                                                                | London                                                                                             |
| 7 <sup>th</sup> July 2023 onwards                                       | Brochure distributed to community participants <sup>27</sup>                                                                                                                                                                                                                                                                                                                                                           | As of 3 <sup>rd</sup> October 2023, > 500 printed copies distributed, > 600 views, > 300 downloads |
| 13 <sup>th</sup> October 2022                                           | Webinar, The Global Health Network                                                                                                                                                                                                                                                                                                                                                                                     | Online                                                                                             |

500

501 **Table 2:** Strengths and limitations of the project and their potential implications.

| Project strengths                                                                                                                                                            | Implications                                                                                                                                                                                                                                                                                                                                                                                                                                                                                                                                                |
|------------------------------------------------------------------------------------------------------------------------------------------------------------------------------|-------------------------------------------------------------------------------------------------------------------------------------------------------------------------------------------------------------------------------------------------------------------------------------------------------------------------------------------------------------------------------------------------------------------------------------------------------------------------------------------------------------------------------------------------------------|
| Using both in-person and online platforms                                                                                                                                    | <ul style="list-style-type: none"> <li>○ The project engaged a large number of people from all walks of life from across Thailand.</li> <li>○ The conversations raised many issues and suggestions on how to mitigate AMR.</li> </ul>                                                                                                                                                                                                                                                                                                                       |
| Conducting the regional conversations in four different regions of Thailand                                                                                                  | <ul style="list-style-type: none"> <li>○ Useful to capture and compare different cultural and geographically specific solutions.</li> <li>○ In some of the regional conversations, participants suggested low-hanging and locally actionable suggestions that they can initiate in their communities.</li> </ul>                                                                                                                                                                                                                                            |
| Conversations events guided by Wellcome’s ‘Responsive Dialogues’ toolkit                                                                                                     | <ul style="list-style-type: none"> <li>○ This engagement approach advocates for sustained multi-directional interactions among conversation participants, and could be considered one of the highest level on the ladder of citizen participation<sup>40</sup>.</li> <li>○ Participants had the chance to discuss their ideas and be challenged by each other and reflect between sessions.</li> <li>○ Direct interactions among policy makers, stakeholders and community members so they could hear first-hand issues raised by other parties.</li> </ul> |
| Project limitations                                                                                                                                                          | Implications                                                                                                                                                                                                                                                                                                                                                                                                                                                                                                                                                |
| Regional differences in community structures and networks; varying availability of formal and informal stores selling antimicrobials and level of enforcement by authorities | <ul style="list-style-type: none"> <li>○ Solutions need to be context-specific, because each community or target group may speak different dialects and have a different level of understanding of health, healthcare and drugs.</li> <li>○ Rather than ‘choosing promising/feasible solutions to take forward’ as suggested by the ‘Responsive Dialogues’ toolkit, we outlined the building blocks of solutions that can be adapted and developed according to context.</li> </ul>                                                                         |
| Background of participants (primarily involved in the use of antimicrobials in human health, e.g. doctors, village health workers)                                           | <ul style="list-style-type: none"> <li>○ Not many solutions related to the agriculture and environmental sectors. In Thailand, the use of antimicrobials in aquaculture, poultry, livestock and fruit farming is recognized<sup>13 34 41</sup>.</li> </ul>                                                                                                                                                                                                                                                                                                  |
| Project focused on engagement with adults (and not children), and on awareness and engagement around AMR, relating to strategy 5 of the NSP-AMR                              | <ul style="list-style-type: none"> <li>○ Excludes other factors known to affect antibiotic use in communities, which are unrelated to a lack of knowledge or awareness<sup>36 42</sup>.</li> <li>○ We did not specifically engage participants with the other five strategies of the NSP-AMR.</li> </ul>                                                                                                                                                                                                                                                    |
| Power dynamics in conversation events                                                                                                                                        | <ul style="list-style-type: none"> <li>○ We may not have heard adequately from community members.</li> <li>○ Although we had expert facilitators in our team, we could not completely eliminate power dynamics.</li> </ul>                                                                                                                                                                                                                                                                                                                                  |
| COVID-19 public health restrictions (e.g. limit on participant numbers, social distancing)                                                                                   | <ul style="list-style-type: none"> <li>○ Did not manage to invite all the participants we intended to.</li> <li>○ Venues were larger than that optimum for such intimate dialogues.</li> </ul>                                                                                                                                                                                                                                                                                                                                                              |
| Lack of follow-up with participants after conversation events                                                                                                                | <ul style="list-style-type: none"> <li>○ Disseminated findings of the project after the events via a ‘LINE’ (instant messenger) group and the brochure, but did not have the resources to conduct follow-up discussions.</li> </ul>                                                                                                                                                                                                                                                                                                                         |
| External influences on the discussion through our project set-up                                                                                                             | <ul style="list-style-type: none"> <li>○ Although participatory in nature, the ‘Responsive Dialogues’ framework still steers conversations in a certain way (e.g. through pre-selection of participants and discussion topics) instead of asking communities which issues matter most to them.</li> <li>○ Facilitators and organisers were external and not part of the community, like for example in a recently described ‘Community Dialogue Approach’, where community volunteers were trained in facilitation techniques<sup>43</sup>.</li> </ul>      |

## Box 1: The four co-created 'building blocks' of solutions to tackle AMR and detailed recommendations from the conversation events

### Messages around AMR should be clear and tailored to the target audience

- ⇒ Tailor information materials according to target audience.
- ⇒ Adapt messages according to context and use the local dialect, or illustrations suitable for the target group.
- ⇒ Messaging should use channels preferred by the target group (e.g. with youth groups, social media platforms are most popular).
- ⇒ Materials should preferably be informed by communications and behaviour change research and tested with the target group before roll-out.
- ⇒ Embed monitoring and evaluation in communication and engagement initiatives. In some communities, it may be useful to engage community influencers or leaders to pass on the knowledge.

### More initiatives to increase general health literacy

- ⇒ Instead of only focusing messaging on antimicrobials and AMR, there should be a move to increase holistic health literacy, which includes sanitation, nutrition and wellness.
- ⇒ Incorporate AMR and health literacy in the school curriculum and informal learning centres for adults.

### Increased availability of AMR-related information at the local level

- ⇒ Participants at the local level, such as village health volunteers and healthcare staff at the primary care level, would like AMR-related information to be 'returned to the community'. These include local data on usage of antimicrobials, deaths due to drug resistant infections and stories at local level. This way, they can make better informed decisions in relation to antimicrobial usage and provide information to their communities.

### Increased local ownership of AMR mitigation efforts

- ⇒ Support shared leadership and increased local leadership in mitigating the problem of AMR.
- ⇒ Community leaders are best placed to create awareness and share knowledge on health and AMR because they know how to engage with their own community.
- ⇒ Local level administration is more permanent than higher level administration and politicians, and there are shorter command chains to implement any activities or programmes.
- ⇒ Local leaders can establish their own AMR task force and community surveillance on unauthorised sales of antimicrobials. This concept is called *bo-worn* in Thai, which means sublime, heavenly or great. *Bo-worn* consists of three parts, *bo*, *wo* and *ro* which is short for *baan* (house or for this context means community or group); *wat* (temple, mosque or church which are places of worship) and *rong-rean* (school and educational institutions). This concept has been used widely to promote and strengthen local networks to address local issues in a sustainable way<sup>44 45</sup>.
- ⇒ Participants said they themselves will find opportunities to raise awareness of AMR in the communities. These include local talks, information sessions and in-person, one-on-one 'heart-to-heart' conversations (จับเข่าคุย (*jap khao kooi*)).
- ⇒ Solutions should take into consideration the culture and preferences of engagement of each region:
  - Northern region: folk story telling
  - North-eastern region: fun and light-hearted activities
  - Southern region: family or community-based activities
  - Central region and other urban areas: social media.

503 **Figure 1:** Cartoon portraying how easily available antibiotics are in Thailand. A woman complains that her  
504 throat hurts and asks for medicine, and a street vendor hands her a cocktail drug ('yaa chud') containing  
505 antibiotics from his cart, stating that these drugs cure everything (original art by team member KB).

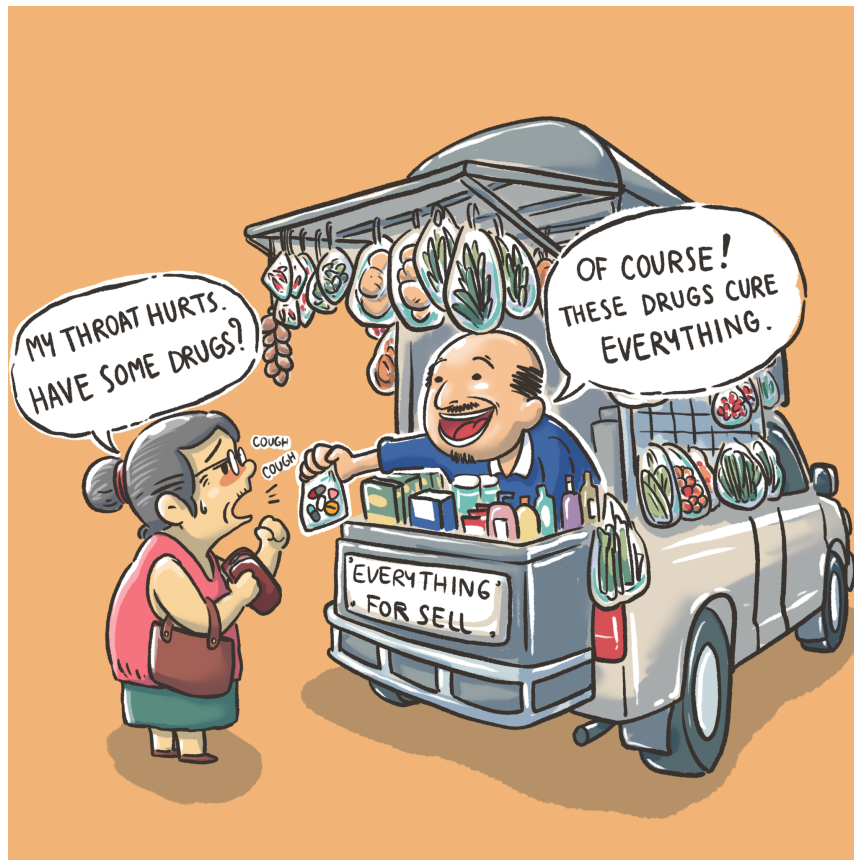

506

507

508

509

510

**Box 2: List of informal local groups and events that participants organised after attending the conversation events.**

- Northern region: Khun Yuam Hospital, Mae Hong Son province, in collaboration with informal school to teach AMR to parents and older people at “Elderly School” in March 2022.
- Southern region: The village health volunteers (VHV) from Pattani and Pattalung Province brought AMR as topic to their VHV monthly meeting in April 2022.
- Central region: The village health volunteer leader from the Klong Toey slum requested an AMR expert to provide training on basic AMR knowledge for village health volunteers in Bangkok’s Klong Toey slum in July 2022.

511

512

513 **Supplementary files (separate document)**

514

515 **Suppl. Table 1:** Extended Thai antimicrobial resistance stakeholder map.

516

517 **Suppl. Table 2:** Additional information about all conversation events, including meeting length, number of  
518 participants, demographics and professional backgrounds.

519

520 **Suppl. Figure 1.** Cartoon-style drawings capturing the atmosphere during the community conversation  
521 events. A) Participants from diverse backgrounds (villager, policy maker, farmer, village health volunteer  
522 = VHV) having a conversation about AMR. B) The regional in-person conversations started with observing  
523 mindfulness each day. C) Participants are surprised to learn about the seriousness of AMR.

524

525
